# Supplementary material for: The catalytic mechanism of the Au@TiO2−x/ZnO catalyst towards a low-temperature water-gas shift reaction
Source: Royal Society of Chemistry journal article supplement (doi:10.1039/c9cy02077b), 2019-12-11
Supplement: c9cy02077b1.pdf [file c9cy02077b1.pdf]

## Electronic Supporting Information

### Catalytic Mechanism of Heterogeneous Au Nanoparticles towards Low-Temperature Water-Gas Shift Reaction

Ning Liu,<sup>a</sup> Pan Yin,<sup>a</sup> Ming Xu,<sup>b</sup> Yusen Yang,<sup>a</sup> Shaomin Zhang,<sup>a</sup> Junbo Zhang,<sup>a</sup> Xiaoyu Meng,<sup>a</sup>

Jian Zhang,<sup>a</sup> Jun Yu,<sup>a</sup> Yi Man,<sup>c</sup> Xin Zhang,<sup>a</sup> Min Wei<sup>\*a</sup>

<sup>a</sup> *State Key Laboratory of Chemical Resource Engineering, Beijing Advanced Innovation  
Center for Soft Matter Science and Engineering, Beijing University of Chemical Technology,  
Beijing 100029, P. R. China*

<sup>b</sup> *College of Chemistry and Molecular Engineering and College of Engineering, BIC-ESAT,  
Peking University, Beijing 100871, P. R. China*

<sup>c</sup> *Beijing Research Institute of Chemical Industry, Sinopec Group, Beijing 100013, People's  
Republic of China*

#### Author Information

\* Corresponding authors. Tel: +86-10-64412131; Fax: +86-10-64425385.

E-mail addresses: [weimin@mail.buct.edu.cn](mailto:weimin@mail.buct.edu.cn) (M. Wei).

## Experimental section

**1. Preparation of ZnTi-MMO.** The preparation of ZnTi-LDHs precursor with  $[\text{Zn}^{2+}]/[\text{Ti}^{4+}] = 2/1$  was similar to the method reported by our group.<sup>1</sup> After a calcination in the muffle furnace at 500 °C for 4 h, ZnTi-LDHs precursor transformed to zinc-titanium mixed metal oxide (ZnTi-MMO).

**2. Preparation of Au@TiO<sub>2-x</sub>/ZnO(H300).** Au samples were prepared *via* a deposition-precipitation method with urea. Typically, 1.0 g of ZnTi-MMO was added to 100 mL of HAuCl<sub>4</sub> ( $1.20 \times 10^{-3}$  M) and urea (0.42 M) mixed aqueous solution. The suspension was heated at 90 °C with vigorous stirring for 4 h, and the resulting precipitation was filtered, centrifugal washing with deionized water thoroughly to eliminate Cl<sup>-</sup> and dried in vacuum at 60 °C for 4 h. Subsequently, the obtained Au/ZnTi-MMO was pretreated in a H<sub>2</sub>/N<sub>2</sub> stream (4:6, v/v) for 2 h at 300 °C (heating rate: 5 °C min<sup>-1</sup>), followed by cooling to 25 °C in a high purity N<sub>2</sub> stream. The obtained samples were denoted as Au@TiO<sub>2-x</sub>/ZnO(H300).

**3. *In situ/operando* DRIFTS experiments.** *In situ* and *operando* diffuse reflectance Fourier transform infrared spectroscopy (*in situ/operando* DRIFTS) was carried out in an *in situ* reaction cell on a Bruker TENSOR II spectrometer equipped with a MCT narrow-band detector. The detailed pre-treatment and test conditions are given as follows:

(1) *In situ* DRIFT spectra with the introduction of various reagents (CO or H<sub>2</sub>O) at 200 °C: prior to the test, the catalyst was firstly reduced in a H<sub>2</sub>/He (v/v, 1:19) stream at 300 °C for 2 h at a heating rate of 5 °C min<sup>-1</sup>, followed by flowing a high purity He (50 mL min<sup>-1</sup>) for 30 min and cooling to 200 °C. Subsequently, H<sub>2</sub>O vapor was introduced into the *in situ* reaction cell *via* a HPLC pump, and the DRIFT spectra were collected within 10 min. Afterwards, a high

purity He ( $50 \text{ mL min}^{-1}$ ) was purged for 30 min, followed by a switch to CO/He (v/v, 1:19) atmosphere for the collection of DRIFT spectra for another 10 min (as shown in Fig. 2).

(2) *Operando* DRIFT spectra with the introduction of reaction atmosphere (6% CO, 25% H<sub>2</sub>O and 69% He) at 200 °C: the catalyst was firstly reduced in a H<sub>2</sub>/He (v/v, 1:19) stream at 300 °C for 2 h at a heating rate of  $5 \text{ °C min}^{-1}$ , followed by flowing a high purity He ( $50 \text{ mL min}^{-1}$ ) for 30 min and cooling to 200 °C. Subsequently, a mixture of CO, H<sub>2</sub>O and He (6% CO, 25% H<sub>2</sub>O and 69% He) was introduced into the reaction cell with a total flux of  $100 \text{ ml min}^{-1}$ , and the DRIFT spectra were collected within 20 min (as shown in Fig. 5).

(3) *In situ* DRIFT spectra with the introduction of H<sub>2</sub>O vapor at different temperatures: the catalyst was firstly reduced in a H<sub>2</sub>/He (v/v, 1:19) stream at 300 °C for 2 h at a heating rate of  $5 \text{ °C min}^{-1}$ , followed by flowing a high purity He ( $50 \text{ mL min}^{-1}$ ) for 30 min and cooling to 100 °C, 150 °C, 200 °C, 250 °C, and 300 °C, respectively. Subsequently, H<sub>2</sub>O vapor was introduced into the *in situ* reaction cell via a HPLC pump and maintained for 10 min at different temperatures. Then, a high purity He ( $50 \text{ mL min}^{-1}$ ) was purged was purged for 30 min and the temperature was decreased to 25 °C. Finally, a switch to CO/He (v/v, 1:19) atmosphere was performed for the collection of DRIFT spectra for 30 min (as shown in Fig. S6).

**4. XAS characterizations.** *In situ/operando* extended X-ray absorption fine structure spectroscopy (EXAFS) at the Au *L*<sub>3</sub>-edge and Ti *K*-edge was carried out at the beamline 1W1B of the Beijing Synchrotron Radiation Facility (BSRF), Institute of High Energy Physics (IHEP), Chinese Academy of Sciences (CAS). The typical energy of the storage ring was 2.5 GeV with a maximum current of 250 mA. The Si (111) double crystal monochromator was used. The powdered sample was first pressed into a thin round sheet with a diameter of 13 cm and placed

into an *in situ* reaction cell equipped with polyimide windows. The detailed experiment procedure is described as follows:

(1) *In situ* EXAFS spectra at Au  $L_3$ -edge with the introduction of various reagents (CO or H<sub>2</sub>O) at 200 °C: The catalyst was firstly reduced in a H<sub>2</sub>/He (v/v, 1:19) stream at 300 °C for 2 h at a heating rate of 5 °C min<sup>-1</sup>, followed by flowing a high purity He (50 mL min<sup>-1</sup>) for 30 min and cooling to 200 °C, and then EXAFS spectra at Au  $L_3$ -edge were collected. Subsequently, H<sub>2</sub>O vapor was introduced into the *in situ* reaction cell *via* a HPLC pump, and Au  $L_3$ -edge EXAFS spectra were collected within 30 min. Finally, a switch to CO/He (v/v, 1:19) atmosphere was performed for the collection of Au  $L_3$ -edge EXAFS spectra for another 30 min (as shown in Fig. 4a).

(2) *Operando* EXAFS spectra at Au  $L_3$ -edge: The sample was firstly reduced in a H<sub>2</sub>/He (v/v, 1:19) stream at 300 °C for 2 h at a heating rate of 5 °C min<sup>-1</sup>, followed by flowing a high purity He (50 mL min<sup>-1</sup>) 30 min and cooling to 200 °C, and then EXAFS spectra at Au  $L_3$ -edge were collected. Subsequently, a mixture of CO, H<sub>2</sub>O and He (6% CO, 25% H<sub>2</sub>O and 69% He) was introduced into the reactor with a total flux of 100 ml min<sup>-1</sup>, and then Au  $L_3$ -edge EXAFS spectra were collected under stable *operando* conditions at 200 °C for 20 min (as shown in Fig. 6a).

(3) *In situ* EXAFS spectra at Ti  $K$ -edge with the introduction of various reagents (CO or H<sub>2</sub>O) at 200 °C: The catalyst was firstly reduced in a H<sub>2</sub>/He (v/v, 1:19) stream at 300 °C for 2 h at a heating rate of 5 °C min<sup>-1</sup>, followed by flowing a high purity He (50 mL min<sup>-1</sup>) 30 min and cooling to 200 °C, and then EXAFS spectra at Ti  $K$ -edge were collected. Subsequently, H<sub>2</sub>O vapor was introduced into the *in situ* reaction cell *via* a HPLC pump, and Ti  $K$ -edge

EXAFS spectra were collected within 30 min. Finally, a switch to CO/He (v/v, 1:19) atmosphere was performed for the collection of Ti *K*-edge EXAFS spectra for another 30 min (as shown in Fig. 4b).

(4) *Operando* EXAFS spectra at Ti *K*-edge: The sample was firstly reduced in a H<sub>2</sub>/He (v/v, 1:19) stream at 300 °C for 2 h at a heating rate of 5 °C min<sup>-1</sup>, followed by flowing a high purity He (50 mL min<sup>-1</sup>) for 30 min and cooling to 200 °C, and then EXAFS spectra at Ti *K*-edge were collected. Subsequently, a mixture of CO, H<sub>2</sub>O and He (6% CO, 25% H<sub>2</sub>O and 69% He) was introduced into the reactor with a total flux of 100 mL min<sup>-1</sup>, and then Ti *K*-edge EXAFS spectra were collected under stable *operando* conditions at 250 °C for 20 min (as shown in Fig. 6b).

**5. *In situ* H<sub>2</sub>O Pulse TPD-MASS and cycling tests of H<sub>2</sub>O and CO Pulse-MASS.** *In situ* H<sub>2</sub>O Pulse TPD-MASS and *in situ* cycling tests of H<sub>2</sub>O and CO Pulse TPD-MASS were performed on a Micromeritics ChemiSorb 2070 with a thermal conductivity detector (TCD). The detailed experimental process is given as follows: In a typical process, ~50 mg of sample was sealed in a quartz tube reactor and reduced in a H<sub>2</sub>/He (v/v, 1:19) stream at 300 °C for 2 h at a heating rate of 5 °C min<sup>-1</sup>, followed by flowing a high purity He (50 mL min<sup>-1</sup>) for 30 min and cooling to 100 °C, 150 °C, 200 °C, 250 °C, and 300 °C, respectively. Finally, pulse water was introduced with a time interval of 5 min (cycle times: 10), and the Mass signals for H<sub>2</sub> and H<sub>2</sub>O were collected during the water pulsing (as shown in Fig. 3a–e). As for the cycling tests of H<sub>2</sub>O and CO Pulse-MASS measurements, after the reduction process in H<sub>2</sub> atmosphere and flushing with He for 30 min, water pulse was induced into the reactor for 2 min at 300 °C, followed by the input of CO pulse for another 2 min. The cycle pulse atmosphere was H<sub>2</sub>O, CO, H<sub>2</sub>O, CO in

sequence for 15–20 cycles. The Mass signals for H<sub>2</sub>, H<sub>2</sub>O, CO and CO<sub>2</sub> were collected during the water flowing (as shown in Fig. 3f).

**6. DFT calculations details.** Quantum mechanical calculations were carried out by employing the DFT method provided in the Vienna ab initio simulation package (VASP).<sup>2,3</sup> The exchange-correlation potential was depicted by the Perdew-Burke-Ernzerh (PBE) of generalized gradient approach (GGA).<sup>4,5</sup> The projector augmented wave (PAW) potentials were used to describe the core electrons.<sup>6,7</sup> k-point sampling (3×3×1) in the surface Brillouin zone and an energy cutoff of 400 eV were applied.<sup>8</sup> Spin polarization was taken into account for all models in the calculations. The converge criteria of the force on each relaxed atom was set to 0.05 eV Å<sup>-1</sup>. The tolerance of energy convergence was 1×10<sup>-5</sup> eV. The space between neighboring slabs was filled with a vacuum region of 10 Å along the direction perpendicular to the surface. Transition state (TS) searches were carried out with the CI-NEB method<sup>9</sup>

The adsorption energy ( $E_{\text{ads}}$ , as shown in Fig. 6c, d) was calculated by the electronic energy difference between the surface containing adsorbate ( $E_{\text{total}}$ ) and the clean surface plus the free molecule in gas phase ( $E_{\text{slab}}+E_{\text{g}}$ ),

$$E_{\text{ads}} = E_{\text{total}} - (E_{\text{slab}} + E_{\text{g}}) \quad (1)$$

The activation barrier ( $E_{\text{a}}$ , as shown in Fig. 7) was obtained from the electronic energy difference between the transition state ( $E_{\text{TS}}$ ) and its corresponding initial state ( $E_{\text{IS}}$ ), which was defined as:

$$E_{\text{a}} = E_{\text{TS}} - E_{\text{IS}} \quad (2)$$

According to the ac-HAADF-STEM observations, Au/TiO<sub>2</sub>(101) was built by a slab of TiO<sub>2</sub> and a supported Au<sub>6</sub> cluster on its surface. TiO<sub>2</sub>(101) surface was represented by  $p$  (2×3)

supercell with three layers, of which the two bottom layers were constrained during the calculation, while the top layer was fully relaxed to participate in reactions. One O<sub>2c</sub> atom was removed to produce oxygen vacancy (O<sub>v</sub>) in Au/TiO<sub>2-x</sub>(101) system, because O<sub>2c</sub> is exposed on the outermost surface of the model.

According to the experimental results, the path of WGSR in the model system obeys the redox mechanism, which consists of six steps: reactants adsorption (R1 and R2), first-step H<sub>2</sub>O dissociation (R3), second-step H<sub>2</sub>O dissociation (R4), H<sub>2</sub> formation (R5), CO oxidation (R6) and products desorption (R7 and R8).

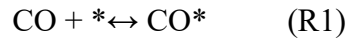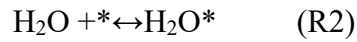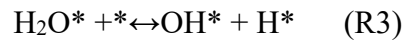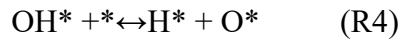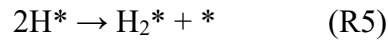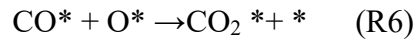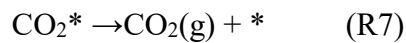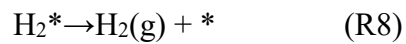

where the “\*” represents a surface site; “X\*” represents the binding of adsorbate to the site.

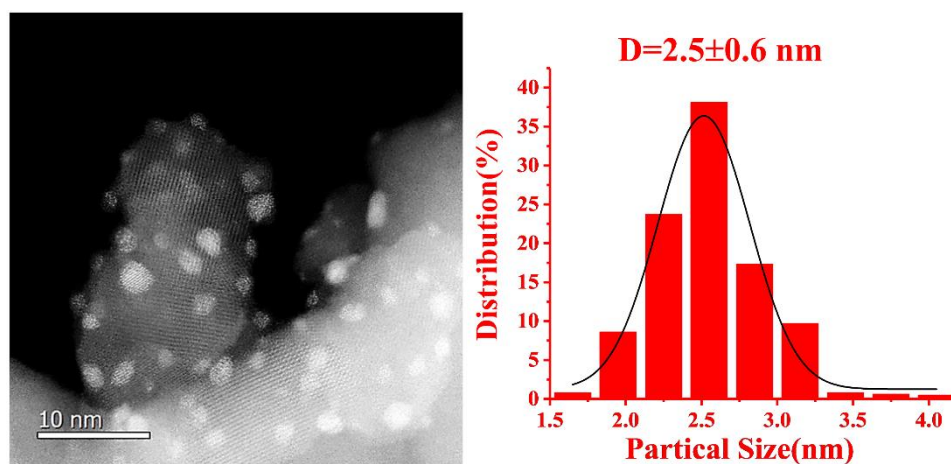

**Fig. S1.** Ac-HAADF-STEM image of the  $\text{Au}@\text{TiO}_{2-x}/\text{ZnO}(\text{H300})$  sample and the corresponding size distribution of Au NPs. The size distribution was obtained by analyzing about 200 Au NPs from STEM image.

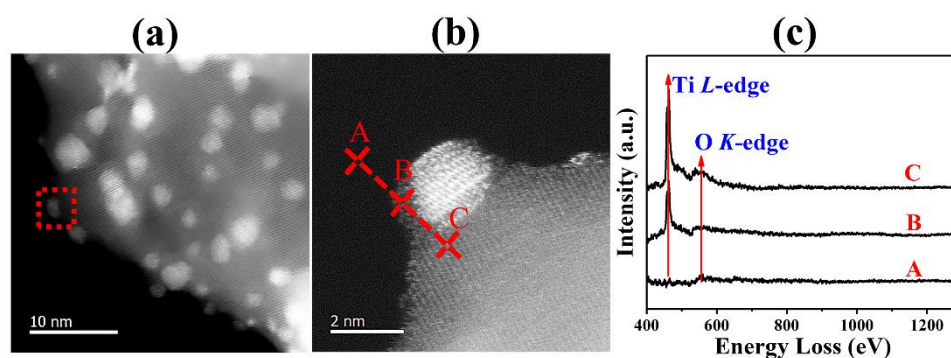

**Fig. S2.** (a) Ac-HAADF-STEM image of the  $\text{Au}@\text{TiO}_{2-x}/\text{ZnO}(\text{H300})$  sample; (b) high resolution ac-HAADF-STEM image in panel a; (c) EELS collected at Spot A, B, C, respectively.

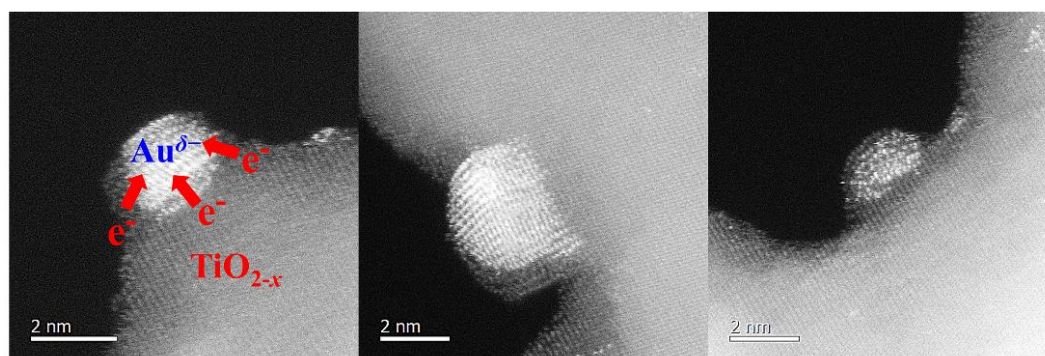

**Fig. S3.** High resolution ac-HAADF-STEM images of the  $\text{Au}@\text{TiO}_{2-x}/\text{ZnO}(\text{H300})$  sample.



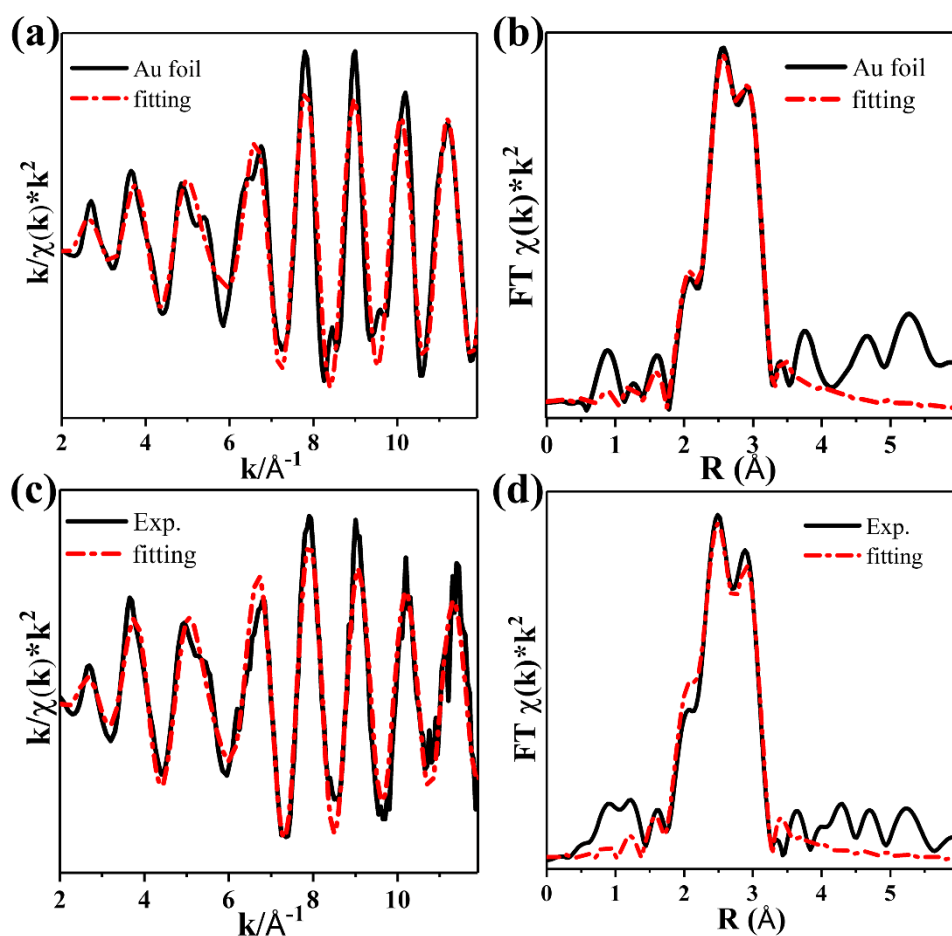

**Fig. S4.** Au L<sub>3</sub> edge EXAFS spectra and fitting results of (a) Au foil k-space, (b) Au foil R-space, (c) Au@TiO<sub>2-x</sub>/ZnO(H300) k-space and (d) Au@TiO<sub>2-x</sub>/ZnO(H300) R-space. The quantified fitting results are listed in Table S2.

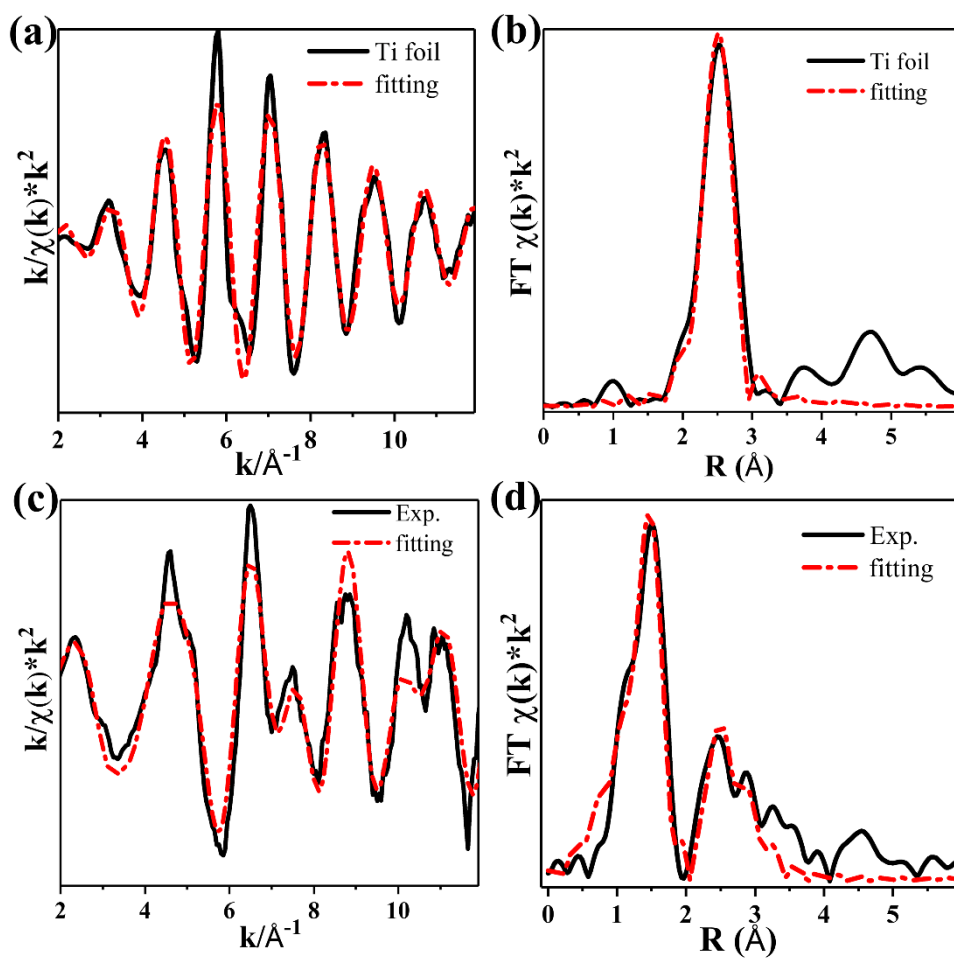

**Fig. S5.** Ti K edge EXAFS spectra and fitting results of (a) Ti foil k-space, (b) Ti foil R-space, (c) Au@TiO<sub>2-x</sub>/ZnO(H300) k-space and (d) Au@TiO<sub>2-x</sub>/ZnO(H300) R-space. The quantified fitting results are listed in Table S3.

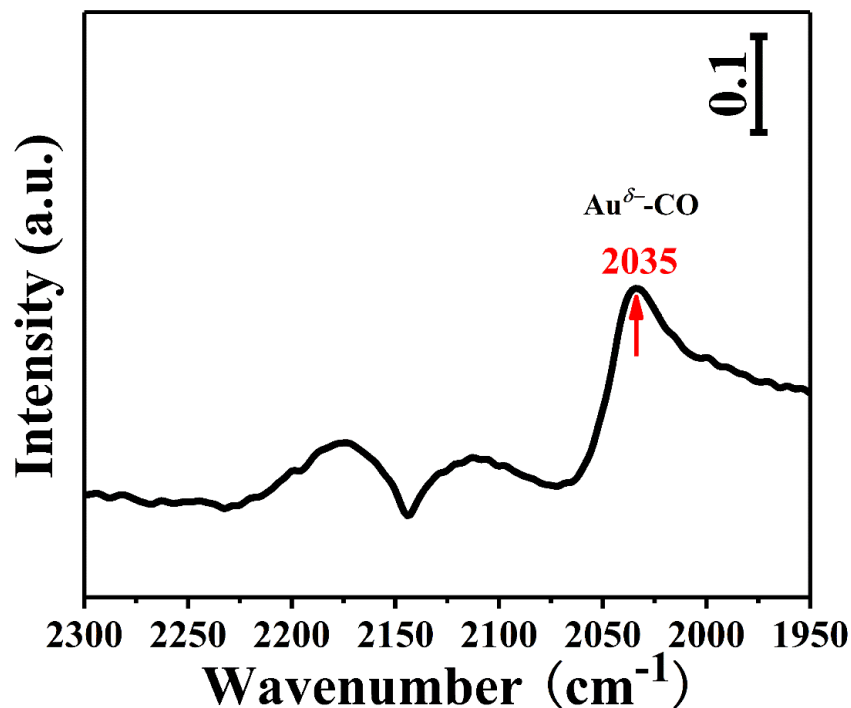

**Fig. S6.** *In situ* DRIFT spectra of CO adsorption on Au@TiO<sub>2-x</sub>/ZnO(H300) catalyst at 200 °C.

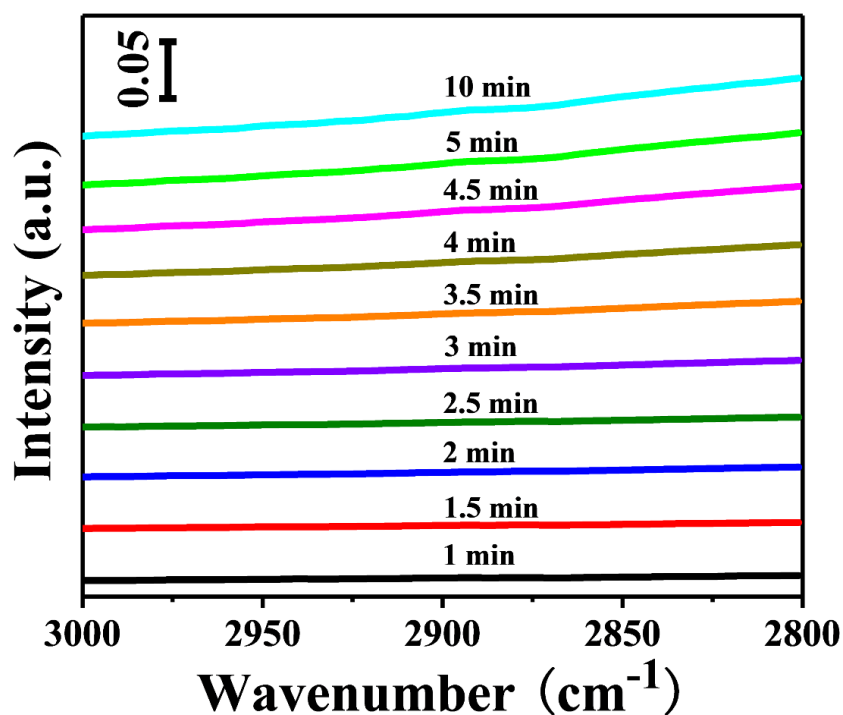

**Fig. S7.** *In situ* time-resolved DRIFTS spectra of CO adsorption on Au@TiO<sub>2-x</sub>/ZnO(H300) catalyst recorded in 3000–2800 cm<sup>-1</sup> upon exposure to H<sub>2</sub>O atmosphere at 200 °C for prolonged time.

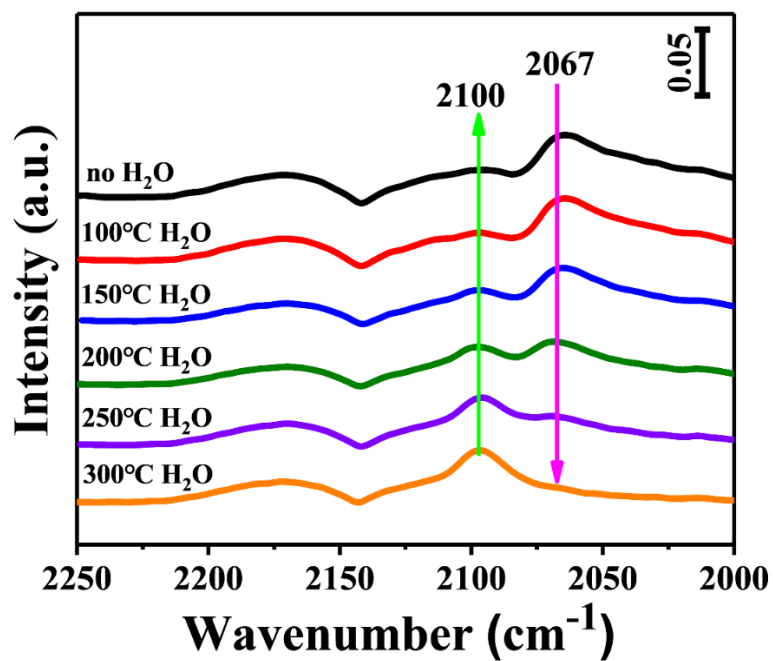

**Fig. S6.** *In situ* DRIFT spectra of CO adsorption on Au@TiO<sub>2-x</sub>/ZnO(H300) catalyst recorded within 2250–2000 cm<sup>-1</sup> after exposure to H<sub>2</sub>O atmosphere for 10 min at various temperatures.

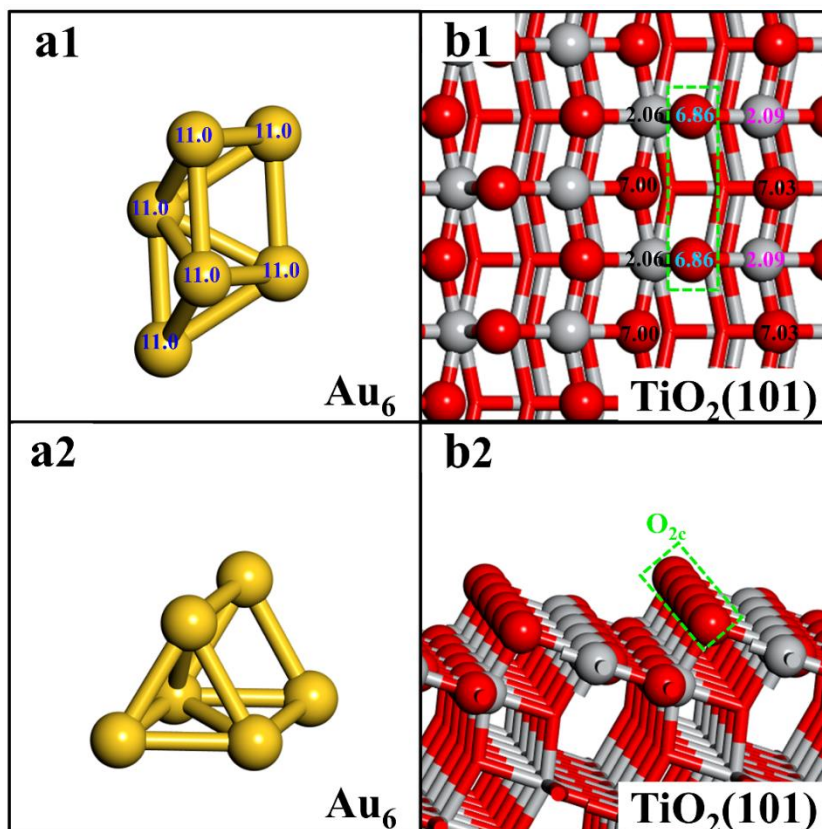

**Fig. S9.** Bader charge of (a) the Au<sub>6</sub> cluster and (b) the TiO<sub>2</sub> (101) slab.

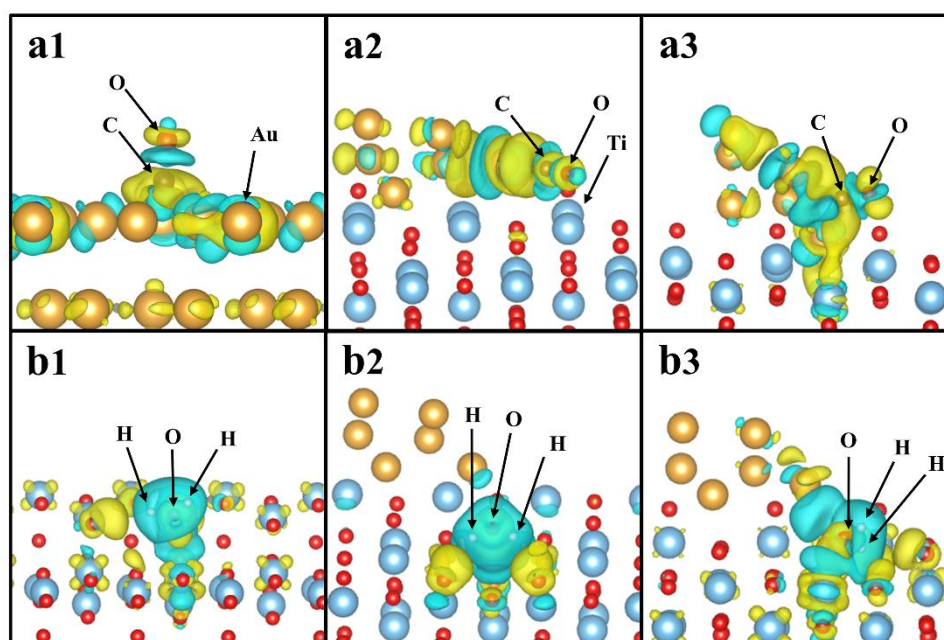

**Fig. S10.** Calculated electron density difference diagrams for (a) CO and (b) H<sub>2</sub>O on various adsorption sites. Yellow represents an electron accumulation region and blue represents an electron loss region.

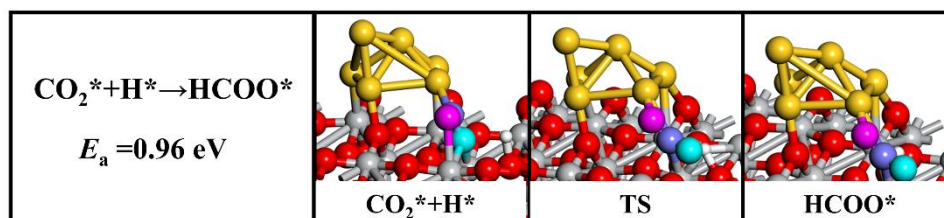

**Fig. S11.** Optimized structures and energy barrier for the reaction between adsorbed CO<sub>2</sub> and H to produce HCOO on the surface of Au/TiO<sub>2-x</sub>(101).

**Table S1.** Activation barriers ( $E_a$ ) of WGSR elementary steps on the  $\text{Au}_6/\text{TiO}_{2-x}(101)$  and  $\text{Au}_6/\text{TiO}_2(101)$  surface

|    | Elementary step                                               | $\text{Au}_6/\text{TiO}_{2-x}(101)$ | $\text{Au}_6/\text{TiO}_2(101)$ |
|----|---------------------------------------------------------------|-------------------------------------|---------------------------------|
|    |                                                               | $E_a$ (eV)                          | $E_a$ (eV)                      |
| R1 | $\text{H}_2\text{O} + * \leftrightarrow \text{H}_2\text{O}^*$ | --                                  | --                              |
| R2 | $\text{CO} + * \leftrightarrow \text{CO}^*$                   | --                                  | --                              |
| R3 | $\text{H}_2\text{O}^* \rightarrow \text{OH}^* + \text{H}^*$   | 0.97                                | 1.21                            |
| R4 | $\text{OH}^* \rightarrow \text{O}^* + \text{H}^*$             | 0.96                                | 1.43                            |
| R5 | $\text{H}^* + \text{H}^* \rightarrow \text{H}_2^*$            | 0.35                                | 1.08                            |
| R6 | $\text{CO}^* + \text{O}^* \rightarrow \text{CO}_2^*$          | 0.33                                | 0.39                            |
| R7 | $\text{CO}_2^* \rightarrow \text{CO}_2(\text{g})$             | --                                  | --                              |
| R8 | $\text{H}_2^* \rightarrow \text{H}_2(\text{g})$               | --                                  | --                              |

**Table S2.** EXAFS parameters of Au foil and  $\text{Au}@\text{TiO}_{2-x}/\text{ZnO}(\text{H300})$  sample

| Sample                                               | Shell | CN      | $R$ (Å) | $\sigma^2/10^{-3}\text{Å}^2$ | $\Delta E_0$ (eV) |
|------------------------------------------------------|-------|---------|---------|------------------------------|-------------------|
| Au foil                                              | Au–Au | 12*     | 2.86    | 7.9±0.2                      | 5.4±0.3           |
| $\text{Au}@\text{TiO}_{2-x}/\text{ZnO}(\text{H300})$ | Au–O  | 0.4±0.1 | 2.06    | 1.0±0.6                      | 4.9±0.6           |
|                                                      | Au–Au | 8.7±0.8 | 2.83    |                              |                   |

CN, coordination number;  $R$ , bonding distance;  $\sigma^2$ , Debye-Waller-factor;  $\Delta E_0$ , shift in absorption edge energy.

\*This value was fixed during EXAFS fitting, based on the known structure of Au.

**Table S3.** EXAFS parameters of Ti foil and  $\text{Au}@\text{TiO}_{2-x}/\text{ZnO}(\text{H300})$  sample

| Sample                                               | Shell | CN      | $R$ (Å) | $\sigma^2/10^{-3}\text{Å}^2$ | $\Delta E_0$ (eV) |
|------------------------------------------------------|-------|---------|---------|------------------------------|-------------------|
| Ti foil                                              | Ti–Ti | 6*      | 2.90    | 7.9±0.1                      | 1.3±0.1           |
|                                                      | Au–O  | 0.4±0.1 | 2.06    | 1.0±0.6                      | 4.9±0.6           |
| $\text{Au}@\text{TiO}_{2-x}/\text{ZnO}(\text{H300})$ | Ti–Au | 2.1±0.6 | 2.74    |                              |                   |
|                                                      | Ti–Ti | 1.2±0.5 | 3.19    |                              |                   |

CN, coordination number;  $R$ , bonding distance;  $\sigma^2$ , Debye-Waller-factor;  $\Delta E_0$ , shift in absorption edge energy.

\*This value was fixed during EXAFS fitting, based on the known structure of Ti.

## REFERENCES

- 1 Y. Zhao, P. Chen, B. Zhang, D. Su, S. Zhang, L. Tian, J. Lu, Z. Li, X. Cao, B. Wang, M. Wei, D. G. Evans, X. Duan, *Chem. Eur. J.*, 2012, **18**, 11949–11958.
- 2 G. Kresse, J. Furthmüller, *Comput. Mater. Sci.*, 1996, **6**, 15–50.
- 3 G. Kresse, J. Furthmüller, *Phys. Rev. B: Condens. Matter Mater. Phys.*, 1996, **54**, 11169–11186.
- 4 J. P. Perdew, K. Burke, M. Ernzerhof, *Phys. Rev. Lett.*, 1996, **77**, 3865–3868.
- 5 X. Yu, C. Huo, Y. Li, J. Wang, H. Jiao, *Surf. Sci.*, 2012, **606**, 872–879.
- 6 G. Kresse, D. Joubert, *Phys. Rev. B: Condens. Matter Mater. Phys.*, 1999, **59**, 1758–1775.
- 7 P. E. Blochl, *Phys. Rev. B: Condens. Matter Mater. Phys.*, 1994, **50**, 17953–17979.
- 8 H. J Monkhorst, J. D. Pack, *Phys. Rev. B.*, 1976, **13**, 5188–5192.
- 9 G. Henkelman, B. P. Uberuaga, H. Jonsson, *J. Chem. Phys.*, 2000, **113**, 9901–9904
